# Supplementary material
Source: ML conference proceedings conference paper supplement (https://openreview.net/forum?id=xKztWnFDtT)
Supplement: supplementary_material [file Baranowski2026THREEDV_ConeGS_Appendix.pdf › 355_ConeGS_Supplementary Material/ConeGS_supplementary/Baranowski2026THREEDV_ConeGS_Appendix.pdf]

## Appendix

This appendix introduces additional results (Section A1) and ablations (Section A2). We then discuss our reconstructed scene structure (Section A3), possible failure cases (Section A4), and provide visualizations for the different types of initializations mentioned in the main paper (Section A5). Finally, we discuss the parallels between 3DGS and NeRF rendering, which allows training a radiance field using the rendering from 3DGS (Section A6).

### A1. Detailed results

Table A1 and Table A2 present results for the no-budget scenario, which were used for plots in Figure 6. We use various values of the  $\beta$  parameter without specifying a budget for our method, except for the last cell, which uses the budget set by the number of Gaussians generated by 3D Gaussian Splatting. For each cell, we also compare MCMC [25] and EDGS [27] where they are set to match the number of Gaussians produced in each of the cells. The comparisons show that our method is able to produce high-quality results even without specifying a budget, instead adjusting the number of primitives based on the scene complexity, while still remaining sparse in the number of primitives. Notably, even when setting  $\beta = 0$ , which effectively disables densification, our method still performs well due to a dense initialization and effective filtering of unnecessary primitives enforced by the opacity penalty, consistent with

| Ablation                | PSNR $\uparrow$ | SSIM $\uparrow$ | LPIPS $\downarrow$ | FPS $\uparrow$ | # Gaussians |
|-------------------------|-----------------|-----------------|--------------------|----------------|-------------|
| Ours ( $\beta = 0$ )    | 29.12           | 0.873           | 0.183              | 185            | 542k        |
| MCMC (SfM)              | 28.86           | 0.865           | 0.209              | 136            |             |
| EDGS                    | 28.87           | 0.868           | 0.187              | 194            |             |
| Ours ( $\beta = 0.01$ ) | 29.25           | 0.877           | 0.174              | 169            | 674k        |
| MCMC (SfM)              | 29.06           | 0.870           | 0.199              | 119            |             |
| EDGS                    | 28.97           | 0.873           | 0.178              | 167            |             |
| Ours ( $\beta = 0.02$ ) | 29.34           | 0.880           | 0.166              | 146            | 942k        |
| MCMC (SfM)              | 29.15           | 0.876           | 0.189              | 101            |             |
| EDGS                    | 29.10           | 0.878           | 0.167              | 134            |             |
| Ours ( $\beta = 0.04$ ) | 29.38           | 0.881           | 0.161              | 105            | 1.66M       |
| MCMC (SfM)              | 29.32           | 0.882           | 0.174              | 77             |             |
| EDGS                    | 29.19           | 0.881           | 0.159              | 102            |             |
| Ours                    | 29.35           | 0.879           | 0.159              | 80             | 2.57M       |
| MCMC (SfM)              | 29.56           | 0.887           | 0.164              | 55             |             |
| EDGS                    | 29.37           | 0.884           | 0.153              | 67             |             |
| 3DGS                    | 29.03           | 0.870           | 0.184              | 69             |             |

Table A1. **No-budget Mip-NeRF360.** Comparison of reconstruction quality without a fixed limit on the number of primitives. For each cell, our method is run with a different  $\beta$  parameter, which determines the number of Gaussians generated, and the other methods are limited to this number. In the last cell, the number of Gaussians is set to match the amount produced by 3DGS, with all other methods constrained accordingly. Results are averaged over the Mip-NeRF360 [3] dataset.

| Ablation                | PSNR $\uparrow$ | SSIM $\uparrow$ | LPIPS $\downarrow$ | FPS $\uparrow$ | # Gaussians |
|-------------------------|-----------------|-----------------|--------------------|----------------|-------------|
| Ours ( $\beta = 0$ )    | 28.54           | 0.879           | 0.195              | 253            | 352k        |
| MCMC (SfM)              | 28.37           | 0.877           | 0.207              | 199            |             |
| EDGS                    | 28.62           | 0.885           | 0.183              | 219            |             |
| Ours ( $\beta = 0.01$ ) | 29.02           | 0.890           | 0.176              | 237            | 438k        |
| MCMC (SfM)              | 28.55           | 0.882           | 0.199              | 175            |             |
| EDGS                    | 28.84           | 0.890           | 0.173              | 211            |             |
| Ours ( $\beta = 0.02$ ) | 29.19           | 0.894           | 0.166              | 217            | 581k        |
| MCMC (SfM)              | 28.79           | 0.888           | 0.190              | 157            |             |
| EDGS                    | 29.07           | 0.896           | 0.163              | 188            |             |
| Ours ( $\beta = 0.04$ ) | 29.32           | 0.898           | 0.157              | 116            | 927k        |
| MCMC (SfM)              | 29.05           | 0.895           | 0.177              | 105            |             |
| EDGS                    | 29.35           | 0.902           | 0.151              | 134            |             |
| Ours                    | 29.60           | 0.904           | 0.144              | 114            | 1.75M       |
| MCMC                    | 29.46           | 0.904           | 0.157              | 89             |             |
| EDGS                    | 29.85           | 0.909           | 0.137              | 99             |             |
| 3DGS                    | 29.30           | 0.896           | 0.171              | 88             |             |

Table A2. **No-budget OMMO.** Comparison of reconstruction quality without a fixed limit on the number of primitives. For each cell, our method is run with a different  $\beta$  parameter, which determines the number of Gaussians generated, and the other methods are limited to this number. In the last cell, the number of Gaussians is set to match the amount produced by 3DGS, with all other methods constrained accordingly. Results are averaged over the OMMO [33] dataset.

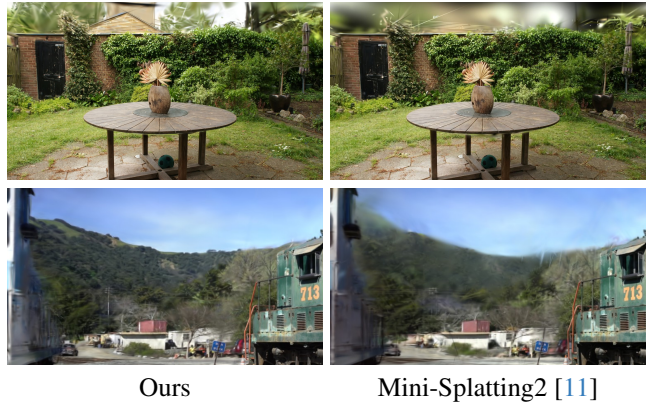

Figure A1. **Qualitative comparison** between our approach and Mini-Splatting2 [11] on the garden scene from Mip-NeRF360 [3] and on the train scene from Tanks & Temples [26].

findings in [27]. However, this configuration does not allow explicit control over the number of primitives and may limit the achievable reconstruction quality.

If an even lower number of Gaussians is desired while still using a no-budget scenario, the number of initialized Gaussians can be reduced, effectively lowering the number of primitives generated at the end.

We show in Table A3 the results on the selected benchmarks for the budget of 1M primitives. Additionally, we present per-scene results for 100k Gaussians in Table A8,

|                                   | Mip-NeRF360 [3] |                 |                    | OMMO [33]       |                 |                    | Tanks & Temples [26] |                 |                    | DeepBlending [19] |                 |                    |
|-----------------------------------|-----------------|-----------------|--------------------|-----------------|-----------------|--------------------|----------------------|-----------------|--------------------|-------------------|-----------------|--------------------|
|                                   | PSNR $\uparrow$ | SSIM $\uparrow$ | LPIPS $\downarrow$ | PSNR $\uparrow$ | SSIM $\uparrow$ | LPIPS $\downarrow$ | PSNR $\uparrow$      | SSIM $\uparrow$ | LPIPS $\downarrow$ | PSNR $\uparrow$   | SSIM $\uparrow$ | LPIPS $\downarrow$ |
| Number of Gaussians limited to 1M |                 |                 |                    |                 |                 |                    |                      |                 |                    |                   |                 |                    |
| 3DGS [24] (SfM init.)             | 28.71           | 0.846           | 0.222              | 29.40           | 0.894           | 0.178              | 23.60                | 0.826           | 0.245              | 28.93             | 0.881           | 0.292              |
| Foroutan et al. [14] <sup>†</sup> | 29.22           | 0.876           | 0.177              | 29.32           | 0.896           | 0.163              | 23.75                | 0.829           | 0.230              | 29.60             | 0.886           | 0.282              |
| MCMC [25] (rand. init.)           | 28.98           | 0.865           | 0.204              | 28.83           | 0.888           | 0.185              | 23.41                | 0.824           | 0.249              | 28.94             | 0.877           | 0.303              |
| MCMC [25] (SfM init.)             | 29.23           | 0.875           | 0.190              | 29.18           | 0.895           | 0.174              | 23.93                | 0.836           | 0.233              | 29.67             | 0.887           | 0.288              |
| MCMC [25] (iNGP init.)            | 29.32           | 0.879           | 0.173              | 28.76           | 0.887           | 0.181              | 23.37                | 0.804           | 0.268              | 29.87             | 0.892           | 0.276              |
| GaussianPro [9]                   | 28.56           | 0.845           | 0.226              | 28.79           | 0.885           | 0.189              | 23.01                | 0.818           | 0.256              | 29.27             | 0.887           | 0.291              |
| Perceptual-GS [64]                | 29.27           | 0.876           | 0.176              | 29.00           | 0.888           | 0.179              | 23.26                | 0.828           | 0.240              | 29.41             | 0.889           | 0.286              |
| EDGS [27]                         | 29.18           | 0.877           | 0.168              | 29.58           | 0.903           | 0.149              | 23.66                | 0.842           | 0.200              | 29.43             | 0.889           | 0.271              |
| Ours                              | 29.37           | 0.880           | 0.168              | 29.44           | 0.899           | 0.154              | 23.70                | 0.835           | 0.207              | 29.69             | 0.889           | 0.273              |

<sup>†</sup> Original code was not publicly available. Our implementation uses iNGP initialization and does not include the additional depth-based loss.

Table A3. **Quantitative results** with a Gaussian number limit of 1M. We highlight the **best**, **second best** and **third best** results among methods with comparable numbers of Gaussians.

|                | Ours | 3DGS (SfM) | MCMC (SfM) | EDGS  | Perceptual-GS |
|----------------|------|------------|------------|-------|---------------|
| # Memory (MiB) | 9545 | 9049       | 8671       | 14517 | 12403         |

Table A4. **Peak GPU memory usage** on the 15 scene from the OMMO dataset [33] on the maximum budget of 500k primitives. We highlight the **best**, **second best** and **third best** results among all.

|                       | PSNR $\uparrow$ | SSIM $\uparrow$ | LPIPS $\downarrow$ | FPS $\uparrow$ | Train (min) $\downarrow$ |
|-----------------------|-----------------|-----------------|--------------------|----------------|--------------------------|
| ConeGS                | 29.14           | 0.892           | 0.170              | 217            | 25                       |
| ConeGS (iNGP retrain) | 29.27           | 0.893           | 0.168              | 212            | 29                       |

Table A5. **Ablation on additional iNGP training** on the OMMO [33] dataset with 500k primitives, evaluating the effect of continuing training iNGP in parallel with the full 3DGS optimization. We highlight the **best**, **second best** and **third best** results among all.

500k Gaussians in Table A9, 1M Gaussians in Table A10, and 2M Gaussians in Table A11. We also show additional qualitative results with Mini-Splatting2 [11] in Figure A1.

## A2. Additional ablations and comparisons

We evaluate the peak GPU memory usage during optimization for several methods in Table A4. The results show that our method is very close to 3DGS [24] and MCMC [25] in terms of memory consumption, while remaining considerably lower than EDGS [27] and Perceptual-GS [64]. This efficiency allows our method to run on a wider range of GPUs, making it more accessible to devices with limited memory.

We expand on ablation (c) from the main paper, where iNGP continues training in parallel with the full 3DGS optimization. Since iNGP training, like densification, is guided by the L1 error from 3DGS, the iNGP model can better focus on regions where 3DGS reconstruction may fall short, potentially improving densification. The original ablation was tested on a budget of 100k primitives, which may not

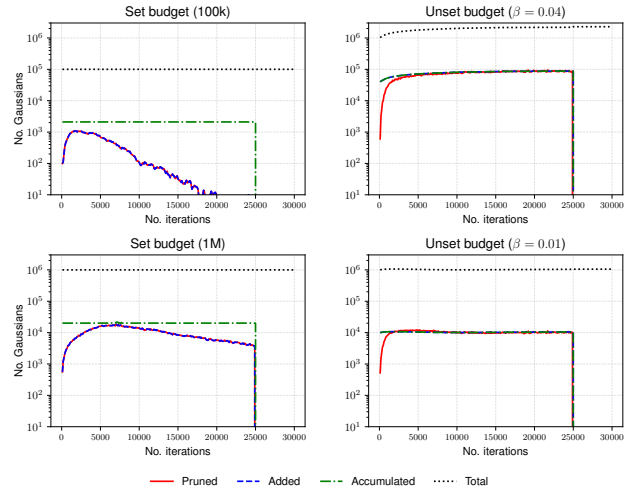

Figure A2. **Number of primitives** pruned, added, accumulated, as well as the total number, during each densification, on different budget scenarios. Results obtained from the garden scene from Mip-NeRF360 [3].

fully reveal this effect. To explore further, we run experiments with larger budgets. On the 500k budget for challenging OMMO [33] scenes (Table A5), we observe additional performance gains, though at the cost of longer training time. We also test this setup with a budget of 1M primitives across all datasets (Table A6), finding minimal improvements on difficult scenes and slight decreases on Mip-NeRF360, which may be caused by overfitting to certain areas.

Figure A2 illustrates the number of primitives added and removed during each densification and pruning step. It also tracks the accumulation buffer of primitives. When no budget is specified, all accumulated primitives are added to the scene (see Eq. 17). Under a fixed budget, however, not all of them are used. This is because accumulation happens every iteration and must remain available for pruning and

|                                   | Mip-NeRF360 [3] |                 |                    | OMMO [33]       |                 |                    | Tanks & Temples [26] |                 |                    | DeepBlending [19] |                 |                    |
|-----------------------------------|-----------------|-----------------|--------------------|-----------------|-----------------|--------------------|----------------------|-----------------|--------------------|-------------------|-----------------|--------------------|
|                                   | PSNR $\uparrow$ | SSIM $\uparrow$ | LPIPS $\downarrow$ | PSNR $\uparrow$ | SSIM $\uparrow$ | LPIPS $\downarrow$ | PSNR $\uparrow$      | SSIM $\uparrow$ | LPIPS $\downarrow$ | PSNR $\uparrow$   | SSIM $\uparrow$ | LPIPS $\downarrow$ |
| Number of Gaussians limited to 1M |                 |                 |                    |                 |                 |                    |                      |                 |                    |                   |                 |                    |
| Ours                              | 29.37           | 0.880           | 0.168              | 29.44           | 0.899           | 0.154              | 23.70                | 0.835           | 0.207              | 29.69             | 0.889           | 0.273              |
| Ours, iNGP training during 3DGS   | 29.25           | 0.879           | 0.168              | 29.54           | 0.900           | 0.152              | 23.72                | 0.836           | 0.207              | 29.73             | 0.889           | 0.273              |

Table A6. **Ablation on additional iNGP training** for the budget of 1M primitives. We highlight the **best**, **second best** and **third best** results among methods with comparable numbers of Gaussians.

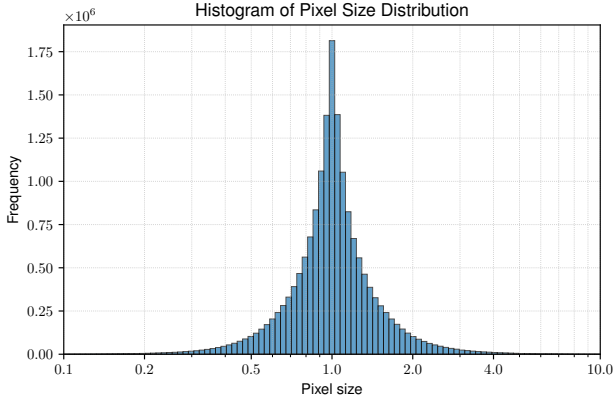

Figure A3. **The histogram of perceived image-space size** of pixel-sized Gaussians rendered from different viewpoints. Size expressed in pixel widths. Analysis doesn't include the low-pass filter from 3DGS rasterization.

|                       | Ours  | MCMC (SfM) | MCMC  | 3DGS (SfM) |
|-----------------------|-------|------------|-------|------------|
| # Gaussians per pixel | 30.72 | 49.55      | 48.45 | 34.74      |

Table A7. **Blending analysis.** Mean number of Gaussians contributing to alpha blending per pixel, averaged across the Mip-NeRF360 [3] dataset using a budget of 1M Gaussians. We highlight the **best**, **second best** and **third best** results among all.

densification, while the exact number that can be added is unknown beforehand. As a result, the system accumulates more primitives than are usually required to keep the total count close to the budget after pruning (see Eq. 16).

The primitive size is defined to be approximately one pixel from a single viewpoint. From other viewpoints, this size is not exactly one pixel, but should remain close. To confirm this, we measure the size of newly added pixel-sized primitives from multiple viewpoints and report the results in Figure A3. The distribution shows that the apparent size remains near one pixel, with very few cases above four pixels or below 0.2 pixels.

### A3. Scene structure

To confirm that our method produces reconstructions with desirable characteristics, such as a balanced distribution of scaling values and placement close to surfaces, which

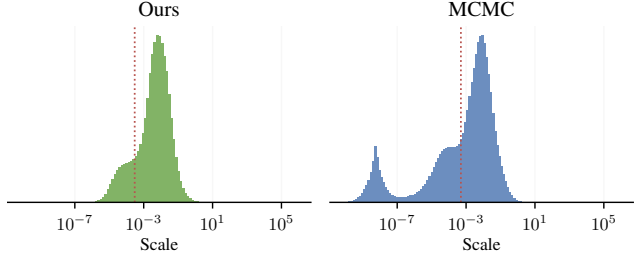

Figure A4. **Histograms of the Gaussian scaling values** for our method and MCMC with SfM initialization on 2M Gaussians. The red lines indicate the minimum scaling required for a Gaussian to cover at least one pixel, disregarding the low-pass filter.

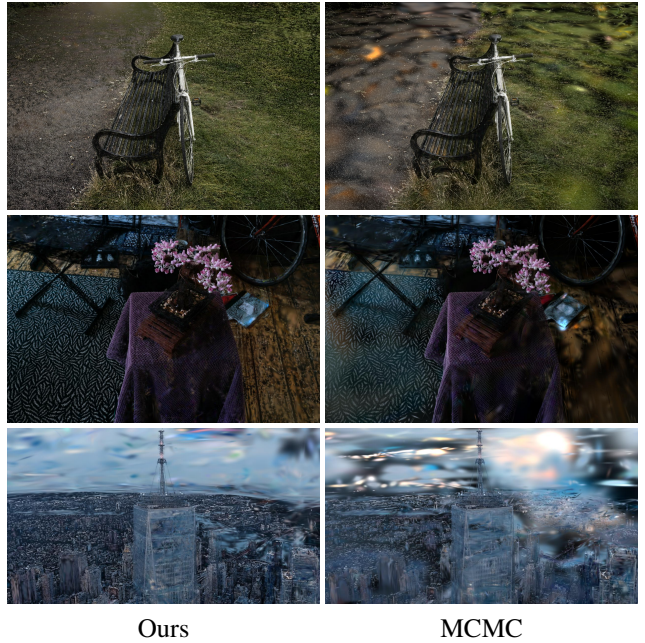

Figure A5. **Shrunk Gaussians.** Visual comparison between the proposed method and MCMC, rendered using Gaussians scaled to half their original size. Both methods were trained with a limit of 1 million primitives on the bicycle and bonsai scenes from Mip-NeRF360 [3], and the 10 scene from OMMO [33].

are often important for downstream tasks, we analyze the scenes created with our method in comparison to MCMC [25].

Although Gaussian Splatting with the MCMC densifica-



tion strategy explores the scene effectively, it also has clear shortcomings. Its cloning strategy and scaling penalty often cause Gaussians to shrink strongly along certain dimensions. The low-pass filter used by 3DGS renderer can hide this effect visually, but it prevents Gaussians from expanding in those directions and interferes with tasks that depend on accurate scales, such as MCMC position error. As shown in Figure A4, many of its Gaussians shrink below the pixel radius, in contrast to the more balanced distribution produced by our method.

Figure A5 shows that our approach produces Gaussians that are more uniform in size and placed closer to object surfaces. This avoids an overreliance on oversized background primitives located far from the surface. This primitive distribution not only improves geometric alignment but also increases rendering speed by reducing blending and sorting overhead during rasterization. To support this hypothesis, Table A7 reports the mean number of Gaussians blended per pixel. Our method consistently requires less blending compared to the selected benchmarks. The difference is especially large compared to MCMC, which blends over 60% more Gaussians per pixel on average.

#### A4. Failure cases

While our method generally produces strong reconstructions on almost all tested scenes, its reliance on iNGP can make it susceptible to floaters in challenging scenarios such as noisy poses, very large or sparse-view scenes, or other cases where reliable iNGP reconstruction is difficult. One such example is shown in Figure A6, where the scene contains distortions and lacks sufficient viewpoint coverage near the cameras. This leads to spurious high-density regions in iNGP close to the cameras, which in turn degrades densification quality by placing Gaussians in incorrect regions. Although this can reduce performance, the method still produces high-quality reconstructions overall (see per-scene results).

#### A5. Initialization visualizations

The choice of initialization has a strong impact on the performance of 3DGS reconstruction. A sufficiently good initialization can even remove the need for additional densification ([27], Table A1, Table A2). We visualize different initialization types in Figure A7. Initialization from a sparse SfM point cloud often leaves large gaps that are difficult to fill correctly, while our initialization produces a more uniform coverage. Another important strategy is initialization based on pixel width. This approach does not provide a useful inductive bias of larger primitives and can lead to more gaps in unobserved regions, although it may offer faster rendering due to reduced blending (Section 5.2). Finally, our formulation allows scaling the initial primitives in image

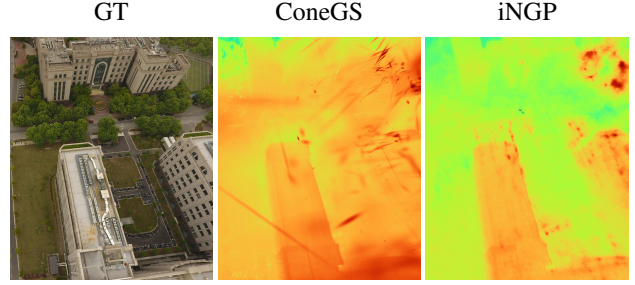

Figure A6. **Depth maps.** Depth maps for ConeGS and the iNGP reconstruction model on the 01 scene from the OMMO [33] dataset. Since the Gaussians are generated from an iNGP reconstruction, the presence of floaters in it leads to floaters also appearing in the Gaussian Splatting results.

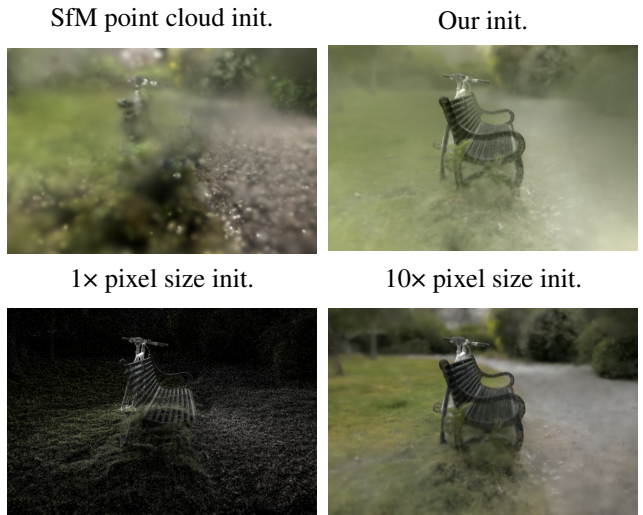

Figure A7. **Initialization Methods Comparison.** Visual comparison of four initialization methods for 3DGS reconstruction on the bicycle scene from Mip-NeRF 360 dataset [3]: (1) SfM point cloud initialization, (2) iNGP initialization with kNN-based sizing, (3) iNGP initialization with 1x sizing, and (4) iNGP initialization using the smaller of 10x pixel size or kNN-based sizing.

space, producing a balance between these two types of initialization.

#### A6. Gaussian-Based Radiance Field training

To establish a more direct connection between the volumetric ray marching procedure in Neural Radiance Fields (NeRF) and the rendering in 3D Gaussian Splatting (3DGS), the set of conical frustums sampled along a cone in Mip-NeRF and its derivatives [2–4] can be reinterpreted as a set of 3D Gaussian primitives, covering approximately the same area. The purpose of this reformulation is to enable training a neural radiance field model using only the 3DGS renderer, without using the traditional volumetric ray integration.

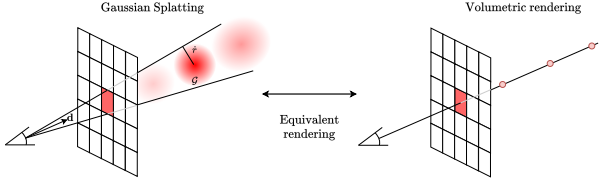

Figure A8. **Training equivalence.** Illustration of the equivalence between training an implicit radiance field model using NeRF-style ray marching and 3D Gaussian Splatting rasterization.

To align the 3DGS and NeRF rendering formulations, it is necessary to demonstrate that an entire ray can be equivalently represented as a sequence of Gaussians such that, when rendered, the result is equal to the volumetric integration process. This is achieved by casting cones along pixel directions and subdividing each into a set of conical frustums. Each frustum is then mapped to a Gaussian primitive, where the midpoint

$$t_{\mu,i} = \frac{t_i + t_{i+1}}{2} \quad (\text{A1})$$

is used to define the Gaussian center  $\mathbf{p}_i$ . The view-dependent RGB color  $\mathbf{c}_i$  and scalar density  $\sigma_i$ , which is converted to opacity  $o_i$  using Eq. 6, are predicted by a neural network. As detailed in Section 4.1, the predicted RGB color  $\mathbf{c}_i$  is encoded as spherical harmonics coefficients, which are compatible with the 3DGS rasterizer.

Since the Gaussians lie along the cone and their centers are co-linear with the pixel center and the camera origin, their projected 2D means fall directly on the target pixel. Consequently, the maximum opacity contribution aligns with the pixel center, and the kernel evaluation satisfies

$$K(\mathbf{p}_c, \boldsymbol{\mu}_i^{2D}, \boldsymbol{\Sigma}_i^{2D}) = 1. \quad (\text{A2})$$

This condition ensures that the Gaussian opacity  $o_i$  corresponds directly to the opacity  $\alpha_i$  used in blending operations, as defined in Eq. 6 and Eq. 2. The opacity is therefore determined by the predicted density and the length of the corresponding frustum.

To maintain consistent 2D projection footprints across different depths, each Gaussian’s 3D covariance must be adjusted based on its location along the cone. Because elongating Gaussians along the ray direction does not affect the resulting 2D projection, the scaling can be derived using the pixel footprint size and set isotropically using the formulation in Eq. 15, while the quaternion can be set to the identity quaternion.

Given these assignments for position, color, opacity, scale, and orientation, each Gaussian can be rendered using the 3DGS renderer to produce the same pixel color as that produced by volumetric rendering. Assuming no low-pass filtering is applied and that only a single image is ren-

dered at a time, it becomes possible to train an Instant-NGP-style model using only the 3DGS rendering pipeline. Although this approach is marginally slower than traditional ray marching, it yields equivalent radiance field representations. A visual comparison of both approaches is shown in Figure A8.

This reinterpretation also provides a more principled foundation for the proposed densification strategy. Instead of using depth, the strategy can be understood as selecting a Gaussian that corresponds to a surface-level conical frustum of pixels with high photometric error. This establishes a clearer theoretical link between cone-based densification and neural implicit models such as NeRF.

| Scene                |            | Ours                        | 3DGS (SfM)                  | MCMC (SfM)                  | EDGS                        |
|----------------------|------------|-----------------------------|-----------------------------|-----------------------------|-----------------------------|
| Mip-NeRF360 [3]      | Bicycle    | 24.05 / 0.652 / 0.379 / 368 | 20.99 / 0.470 / 0.543 / 466 | 23.34 / 0.630 / 0.400 / 339 | 23.68 / 0.635 / 0.393 / 444 |
|                      | Garden     | 24.69 / 0.709 / 0.336 / 431 | 22.87 / 0.589 / 0.445 / 430 | 24.51 / 0.710 / 0.350 / 569 | 24.47 / 0.706 / 0.341 / 493 |
|                      | Stump      | 25.71 / 0.707 / 0.351 / 456 | 22.79 / 0.547 / 0.498 / 506 | 25.16 / 0.680 / 0.370 / 402 | 25.08 / 0.673 / 0.377 / 588 |
|                      | Room       | 31.09 / 0.903 / 0.254 / 275 | 27.02 / 0.859 / 0.328 / 267 | 30.37 / 0.900 / 0.270 / 224 | 30.08 / 0.896 / 0.265 / 317 |
|                      | Counter    | 28.22 / 0.879 / 0.251 / 229 | 25.64 / 0.845 / 0.307 / 252 | 27.83 / 0.880 / 0.260 / 198 | 27.77 / 0.877 / 0.251 / 245 |
|                      | Kitchen    | 29.73 / 0.896 / 0.183 / 239 | 20.53 / 0.671 / 0.440 / 297 | 28.37 / 0.890 / 0.210 / 246 | 28.84 / 0.891 / 0.186 / 269 |
|                      | Bonsai     | 30.67 / 0.920 / 0.241 / 276 | 25.41 / 0.866 / 0.331 / 326 | 29.84 / 0.910 / 0.260 / 281 | 29.73 / 0.906 / 0.256 / 298 |
|                      | Average    | 27.74 / 0.809 / 0.285 / 325 | 23.61 / 0.692 / 0.413 / 363 | 27.06 / 0.800 / 0.303 / 323 | 27.09 / 0.798 / 0.296 / 379 |
| OMMO [33]            | 01         | 22.58 / 0.625 / 0.458 / 212 | 20.53 / 0.543 / 0.575 / 159 | 22.66 / 0.620 / 0.470 / 180 | 22.50 / 0.608 / 0.475 / 222 |
|                      | 03         | 25.39 / 0.842 / 0.244 / 356 | 24.09 / 0.803 / 0.295 / 112 | 24.30 / 0.810 / 0.290 / 217 | 24.85 / 0.827 / 0.259 / 313 |
|                      | 05         | 27.95 / 0.863 / 0.246 / 415 | 26.87 / 0.841 / 0.296 / 354 | 27.70 / 0.860 / 0.270 / 318 | 27.69 / 0.856 / 0.259 / 398 |
|                      | 06         | 27.30 / 0.913 / 0.202 / 321 | 26.53 / 0.899 / 0.229 / 107 | 26.25 / 0.910 / 0.210 / 339 | 26.60 / 0.910 / 0.198 / 339 |
|                      | 10         | 29.31 / 0.853 / 0.252 / 338 | 28.86 / 0.833 / 0.291 / 125 | 28.70 / 0.840 / 0.280 / 337 | 28.78 / 0.839 / 0.275 / 341 |
|                      | 13         | 30.36 / 0.899 / 0.211 / 449 | 29.79 / 0.889 / 0.247 / 171 | 29.45 / 0.880 / 0.250 / 378 | 28.98 / 0.878 / 0.234 / 468 |
|                      | 14         | 29.73 / 0.924 / 0.145 / 394 | 27.09 / 0.874 / 0.220 / 237 | 29.26 / 0.920 / 0.160 / 360 | 28.92 / 0.909 / 0.169 / 374 |
|                      | 15         | 28.10 / 0.893 / 0.182 / 405 | 27.80 / 0.877 / 0.213 / 153 | 27.72 / 0.890 / 0.200 / 427 | 27.58 / 0.877 / 0.215 / 420 |
|                      | Average    | 27.59 / 0.852 / 0.242 / 361 | 26.45 / 0.820 / 0.296 / 177 | 27.00 / 0.841 / 0.266 / 320 | 26.99 / 0.838 / 0.261 / 359 |
| Tanks & Temples [26] | Truck      | 24.54 / 0.822 / 0.291 / 184 | 23.59 / 0.803 / 0.318 / 128 | 23.86 / 0.810 / 0.316 / 155 | 23.33 / 0.799 / 0.314 / 183 |
|                      | Train      | 21.70 / 0.759 / 0.328 / 204 | 21.17 / 0.744 / 0.349 / 118 | 21.13 / 0.749 / 0.347 / 160 | 21.31 / 0.756 / 0.334 / 180 |
|                      | Average    | 23.12 / 0.790 / 0.309 / 194 | 22.38 / 0.774 / 0.334 / 123 | 22.49 / 0.780 / 0.332 / 158 | 22.32 / 0.778 / 0.324 / 182 |
| Deep Blending [19]   | Dr Johnson | 28.78 / 0.875 / 0.338 / 447 | 23.58 / 0.808 / 0.440 / 521 | 28.16 / 0.869 / 0.343 / 550 | 27.66 / 0.865 / 0.347 / 444 |
|                      | Playroom   | 30.09 / 0.885 / 0.318 / 489 | 25.72 / 0.845 / 0.384 / 489 | 29.72 / 0.883 / 0.323 / 552 | 29.19 / 0.879 / 0.327 / 486 |
|                      | Average    | 29.44 / 0.880 / 0.328 / 468 | 24.65 / 0.827 / 0.412 / 505 | 28.94 / 0.876 / 0.333 / 551 | 28.43 / 0.872 / 0.337 / 465 |

Table A8. **Detailed results** on a selection of datasets and methods with the number of Gaussians limited to 100k. Each field contains PSNR, SSIM, LPIPS and FPS respectively. We highlight the **best**, **second best** and **third best** results among all. Slight discrepancies from the main table are due to rounding.

| Scene                |            | Ours                        | 3DGS (SfM)                  | MCMC (SfM)                  | EDGS                        |
|----------------------|------------|-----------------------------|-----------------------------|-----------------------------|-----------------------------|
| Mip-NeRF360 [3]      | Bicycle    | 25.25 / 0.758 / 0.242 / 234 | 24.06 / 0.651 / 0.370 / 174 | 24.90 / 0.740 / 0.282 / 162 | 24.95 / 0.751 / 0.251 / 248 |
|                      | Garden     | 26.87 / 0.837 / 0.157 / 246 | 25.16 / 0.743 / 0.296 / 297 | 26.36 / 0.823 / 0.189 / 221 | 26.49 / 0.833 / 0.161 / 252 |
|                      | Stump      | 27.03 / 0.793 / 0.215 / 255 | 25.27 / 0.688 / 0.348 / 226 | 26.81 / 0.779 / 0.250 / 175 | 26.50 / 0.768 / 0.237 / 296 |
|                      | Room       | 32.02 / 0.924 / 0.205 / 192 | 31.47 / 0.913 / 0.234 / 112 | 31.72 / 0.921 / 0.221 / 114 | 31.36 / 0.923 / 0.203 / 168 |
|                      | Counter    | 28.87 / 0.906 / 0.194 / 148 | 28.86 / 0.901 / 0.213 / 113 | 28.95 / 0.907 / 0.205 / 93  | 29.05 / 0.912 / 0.184 / 137 |
|                      | Kitchen    | 31.38 / 0.929 / 0.124 / 172 | 30.76 / 0.918 / 0.143 / 111 | 31.04 / 0.921 / 0.141 / 111 | 31.35 / 0.928 / 0.122 / 154 |
|                      | Bonsai     | 32.16 / 0.944 / 0.191 / 190 | 31.95 / 0.936 / 0.218 / 135 | 31.97 / 0.939 / 0.210 / 128 | 32.02 / 0.942 / 0.191 / 170 |
|                      | Average    | 29.08 / 0.870 / 0.190 / 205 | 28.22 / 0.821 / 0.260 / 167 | 28.82 / 0.861 / 0.214 / 143 | 28.82 / 0.865 / 0.193 / 204 |
| OMMO [33]            | 01         | 23.46 / 0.690 / 0.356 / 140 | 23.81 / 0.682 / 0.385 / 102 | 23.73 / 0.685 / 0.378 / 90  | 23.63 / 0.686 / 0.363 / 84  |
|                      | 03         | 27.01 / 0.887 / 0.181 / 197 | 26.18 / 0.868 / 0.220 / 111 | 26.50 / 0.875 / 0.212 / 105 | 27.16 / 0.892 / 0.176 / 93  |
|                      | 05         | 28.61 / 0.877 / 0.199 / 232 | 28.53 / 0.874 / 0.235 / 162 | 28.71 / 0.877 / 0.233 / 154 | 28.79 / 0.881 / 0.196 / 122 |
|                      | 06         | 27.79 / 0.932 / 0.159 / 195 | 27.59 / 0.931 / 0.161 / 120 | 26.99 / 0.934 / 0.159 / 152 | 27.38 / 0.941 / 0.135 / 105 |
|                      | 10         | 31.16 / 0.905 / 0.165 / 235 | 31.04 / 0.894 / 0.194 / 143 | 30.56 / 0.892 / 0.192 / 168 | 31.11 / 0.906 / 0.165 / 129 |
|                      | 13         | 33.02 / 0.949 / 0.115 / 280 | 32.40 / 0.939 / 0.149 / 165 | 32.18 / 0.934 / 0.155 / 175 | 31.95 / 0.944 / 0.123 / 151 |
|                      | 14         | 31.57 / 0.950 / 0.096 / 225 | 31.57 / 0.946 / 0.107 / 135 | 31.14 / 0.946 / 0.108 / 130 | 31.51 / 0.950 / 0.095 / 112 |
|                      | 15         | 30.50 / 0.944 / 0.090 / 231 | 30.59 / 0.934 / 0.114 / 149 | 29.92 / 0.933 / 0.113 / 162 | 30.52 / 0.942 / 0.095 / 125 |
|                      | Average    | 29.14 / 0.892 / 0.170 / 217 | 28.96 / 0.884 / 0.196 / 136 | 28.72 / 0.885 / 0.194 / 142 | 29.01 / 0.893 / 0.169 / 115 |
| Tanks & Temples [26] | Truck      | 25.41 / 0.858 / 0.204 / 122 | 24.80 / 0.842 / 0.253 / 93  | 25.24 / 0.851 / 0.242 / 68  | 24.66 / 0.850 / 0.212 / 114 |
|                      | Train      | 21.97 / 0.799 / 0.253 / 140 | 22.28 / 0.790 / 0.277 / 72  | 22.12 / 0.798 / 0.275 / 86  | 22.27 / 0.812 / 0.246 / 104 |
|                      | Average    | 23.69 / 0.829 / 0.229 / 131 | 23.54 / 0.816 / 0.265 / 82  | 23.68 / 0.825 / 0.259 / 77  | 23.47 / 0.831 / 0.229 / 109 |
| Deep Blending [19]   | Dr Johnson | 29.20 / 0.890 / 0.291 / 270 | 28.85 / 0.881 / 0.307 / 151 | 28.71 / 0.884 / 0.313 / 180 | 28.60 / 0.888 / 0.292 / 269 |
|                      | Playroom   | 30.51 / 0.892 / 0.279 / 287 | 29.66 / 0.883 / 0.298 / 161 | 30.16 / 0.889 / 0.303 / 209 | 30.06 / 0.890 / 0.281 / 277 |
|                      | Average    | 29.86 / 0.891 / 0.285 / 278 | 29.26 / 0.882 / 0.303 / 156 | 29.44 / 0.887 / 0.308 / 194 | 29.33 / 0.889 / 0.287 / 273 |

Table A9. **Detailed results** on a selection of datasets and methods with the number of Gaussians limited to 500k. Each field contains PSNR, SSIM, LPIPS and FPS respectively. We highlight the **best**, **second best** and **third best** results among all. Slight discrepancies from the main table are due to rounding.

| Scene                |            | Ours                        | 3DGS (SfM)                  | MCMC (SfM)                  | EDGS                        |
|----------------------|------------|-----------------------------|-----------------------------|-----------------------------|-----------------------------|
| Mip-NeRF360 [3]      | Bicycle    | 25.45 / 0.778 / 0.198 / 156 | 24.40 / 0.688 / 0.325 / 129 | 25.34 / 0.768 / 0.238 / 106 | 25.26 / 0.778 / 0.199 / 161 |
|                      | Garden     | 27.42 / 0.861 / 0.115 / 162 | 26.70 / 0.827 / 0.172 / 142 | 26.83 / 0.847 / 0.147 / 135 | 27.05 / 0.857 / 0.118 / 158 |
|                      | Stump      | 27.23 / 0.802 / 0.184 / 164 | 25.64 / 0.719 / 0.301 / 162 | 27.21 / 0.798 / 0.213 / 110 | 26.71 / 0.783 / 0.203 / 179 |
|                      | Room       | 32.30 / 0.928 / 0.196 / 139 | 31.62 / 0.918 / 0.221 / 82  | 32.09 / 0.926 / 0.208 / 79  | 31.71 / 0.928 / 0.191 / 111 |
|                      | Counter    | 29.21 / 0.911 / 0.181 / 107 | 29.11 / 0.907 / 0.201 / 75  | 29.24 / 0.913 / 0.191 / 61  | 29.27 / 0.917 / 0.171 / 94  |
|                      | Kitchen    | 31.66 / 0.932 / 0.117 / 118 | 31.18 / 0.924 / 0.131 / 78  | 31.44 / 0.927 / 0.130 / 72  | 31.83 / 0.933 / 0.114 / 101 |
|                      | Bonsai     | 32.33 / 0.945 / 0.183 / 132 | 32.34 / 0.941 / 0.205 / 95  | 32.46 / 0.944 / 0.199 / 81  | 32.44 / 0.947 / 0.181 / 115 |
|                      | Average    | 29.37 / 0.880 / 0.168 / 140 | 28.71 / 0.846 / 0.222 / 109 | 29.23 / 0.875 / 0.189 / 92  | 29.18 / 0.878 / 0.168 / 131 |
| OMMO [33]            | 01         | 23.73 / 0.711 / 0.315 / 104 | 24.18 / 0.703 / 0.350 / 73  | 24.18 / 0.709 / 0.341 / 63  | 24.02 / 0.709 / 0.321 / 84  |
|                      | 03         | 27.39 / 0.896 / 0.167 / 127 | 26.96 / 0.886 / 0.197 / 64  | 27.20 / 0.890 / 0.189 / 67  | 27.72 / 0.905 / 0.157 / 85  |
|                      | 05         | 28.56 / 0.877 / 0.185 / 157 | 28.72 / 0.877 / 0.227 / 115 | 28.98 / 0.883 / 0.217 / 98  | 29.15 / 0.885 / 0.181 / 101 |
|                      | 06         | 27.87 / 0.936 / 0.150 / 136 | 27.68 / 0.933 / 0.158 / 110 | 27.46 / 0.939 / 0.146 / 103 | 27.75 / 0.945 / 0.127 / 102 |
|                      | 10         | 31.60 / 0.914 / 0.147 / 170 | 31.47 / 0.906 / 0.171 / 104 | 30.89 / 0.904 / 0.169 / 120 | 31.82 / 0.920 / 0.138 / 116 |
|                      | 13         | 33.55 / 0.957 / 0.098 / 190 | 33.13 / 0.949 / 0.129 / 116 | 32.83 / 0.945 / 0.131 / 124 | 32.83 / 0.955 / 0.100 / 125 |
|                      | 14         | 31.80 / 0.953 / 0.090 / 146 | 31.93 / 0.951 / 0.097 / 89  | 31.44 / 0.950 / 0.099 / 96  | 32.08 / 0.955 / 0.086 / 92  |
|                      | Average    | 29.44 / 0.899 / 0.154 / 148 | 29.40 / 0.894 / 0.178 / 96  | 29.18 / 0.895 / 0.174 / 97  | 29.58 / 0.903 / 0.149 / 101 |
| Tanks & Temples [26] | Truck      | 25.34 / 0.864 / 0.181 / 97  | 25.06 / 0.851 / 0.234 / 70  | 25.57 / 0.862 / 0.217 / 45  | 25.02 / 0.862 / 0.181 / 82  |
|                      | Train      | 22.05 / 0.805 / 0.232 / 109 | 22.13 / 0.801 / 0.255 / 51  | 22.29 / 0.811 / 0.249 / 47  | 22.29 / 0.823 / 0.220 / 78  |
|                      | Average    | 23.70 / 0.835 / 0.207 / 103 | 23.60 / 0.826 / 0.245 / 60  | 23.93 / 0.837 / 0.233 / 46  | 23.66 / 0.843 / 0.201 / 80  |
| Deep Blending [19]   | Dr Johnson | 28.98 / 0.886 / 0.282 / 194 | 28.85 / 0.884 / 0.293 / 106 | 29.06 / 0.884 / 0.291 / 164 | 28.75 / 0.890 / 0.277 / 180 |
|                      | Playroom   | 30.39 / 0.891 / 0.264 / 200 | 29.02 / 0.877 / 0.290 / 112 | 30.28 / 0.890 / 0.284 / 173 | 30.11 / 0.889 / 0.265 / 182 |
|                      | Average    | 29.69 / 0.889 / 0.273 / 197 | 28.94 / 0.881 / 0.292 / 109 | 29.67 / 0.887 / 0.288 / 168 | 29.43 / 0.890 / 0.271 / 181 |

Table A10. **Detailed results** on a selection of datasets and methods with the number of Gaussians limited to 1M. Each field contains PSNR, SSIM, LPIPS and FPS respectively. We highlight the **best**, **second best** and **third best** results among all. Slight discrepancies from the main table are due to rounding.

| Scene                |            | Ours                        | 3DGS (SfM)                  | MCMC (SfM)                  | EDGS                        |
|----------------------|------------|-----------------------------|-----------------------------|-----------------------------|-----------------------------|
| Mip-NeRF360 [3]      | Bicycle    | 25.43 / 0.781 / 0.175 / 99  | 24.85 / 0.729 / 0.267 / 79  | 25.56 / 0.786 / 0.205 / 71  | 25.48 / 0.792 / 0.168 / 93  |
|                      | Garden     | 27.59 / 0.870 / 0.097 / 97  | 27.22 / 0.852 / 0.129 / 84  | 27.33 / 0.862 / 0.122 / 82  | 27.46 / 0.870 / 0.097 / 89  |
|                      | Stump      | 27.03 / 0.796 / 0.177 / 100 | 26.18 / 0.749 / 0.255 / 100 | 27.39 / 0.808 / 0.189 / 69  | 26.79 / 0.788 / 0.186 / 100 |
|                      | Room       | 32.32 / 0.929 / 0.189 / 92  | 31.80 / 0.919 / 0.218 / 63  | 32.14 / 0.929 / 0.199 / 53  | 31.89 / 0.930 / 0.184 / 81  |
|                      | Counter    | 29.23 / 0.912 / 0.175 / 70  | 29.07 / 0.907 / 0.201 / 68  | 29.41 / 0.917 / 0.181 / 42  | 29.37 / 0.918 / 0.164 / 65  |
|                      | Kitchen    | 31.80 / 0.934 / 0.114 / 72  | 31.60 / 0.927 / 0.126 / 54  | 32.00 / 0.931 / 0.122 / 47  | 32.06 / 0.935 / 0.111 / 65  |
|                      | Bonsai     | 32.63 / 0.948 / 0.177 / 84  | 32.34 / 0.941 / 0.204 / 84  | 32.80 / 0.948 / 0.189 / 53  | 32.62 / 0.947 / 0.175 / 85  |
|                      | Average    | 29.43 / 0.881 / 0.158 / 88  | 29.01 / 0.861 / 0.200 / 76  | 29.52 / 0.883 / 0.172 / 60  | 29.38 / 0.883 / 0.155 / 83  |
| OMMO [33]            | 01         | 23.92 / 0.725 / 0.283 / 73  | 24.51 / 0.721 / 0.321 / 49  | 24.51 / 0.731 / 0.303 / 45  | 24.24 / 0.725 / 0.285 / 64  |
|                      | 03         | 27.73 / 0.902 / 0.155 / 70  | 27.05 / 0.888 / 0.193 / 47  | 27.73 / 0.900 / 0.171 / 45  | 27.77 / 0.909 / 0.149 / 82  |
|                      | 05         | 28.65 / 0.877 / 0.176 / 91  | 28.69 / 0.877 / 0.227 / 112 | 29.20 / 0.887 / 0.201 / 67  | 29.31 / 0.887 / 0.169 / 90  |
|                      | 06         | 27.93 / 0.937 / 0.143 / 79  | 27.67 / 0.933 / 0.157 / 109 | 27.58 / 0.942 / 0.138 / 63  | 27.93 / 0.947 / 0.123 / 97  |
|                      | 10         | 31.81 / 0.920 / 0.135 / 104 | 31.77 / 0.915 / 0.153 / 70  | 31.59 / 0.913 / 0.151 / 80  | 32.26 / 0.928 / 0.123 / 89  |
|                      | 13         | 33.88 / 0.961 / 0.088 / 112 | 33.79 / 0.957 / 0.112 / 73  | 33.30 / 0.953 / 0.111 / 80  | 33.55 / 0.961 / 0.087 / 90  |
|                      | 14         | 32.02 / 0.955 / 0.086 / 83  | 31.95 / 0.951 / 0.096 / 82  | 31.75 / 0.953 / 0.093 / 62  | 31.76 / 0.956 / 0.084 / 86  |
|                      | Average    | 31.25 / 0.953 / 0.075 / 86  | 31.35 / 0.947 / 0.090 / 83  | 30.80 / 0.947 / 0.086 / 67  | 31.63 / 0.954 / 0.072 / 87  |
| Tanks & Temples [26] | Truck      | 25.43 / 0.865 / 0.167 / 69  | 25.39 / 0.859 / 0.217 / 53  | 25.86 / 0.869 / 0.193 / 38  | 25.09 / 0.865 / 0.162 / 55  |
|                      | Train      | 21.95 / 0.809 / 0.217 / 77  | 22.29 / 0.802 / 0.253 / 55  | 22.35 / 0.822 / 0.228 / 40  | 21.84 / 0.827 / 0.204 / 58  |
|                      | Average    | 23.69 / 0.837 / 0.192 / 73  | 23.84 / 0.831 / 0.235 / 54  | 24.11 / 0.846 / 0.211 / 39  | 23.47 / 0.846 / 0.183 / 56  |
| Deep Blending [19]   | Dr Johnson | 29.01 / 0.884 / 0.274 / 127 | 28.75 / 0.886 / 0.282 / 77  | 28.83 / 0.882 / 0.285 / 104 | 28.65 / 0.887 / 0.268 / 113 |
|                      | Playroom   | 30.50 / 0.887 / 0.247 / 127 | 29.32 / 0.880 / 0.279 / 83  | 30.22 / 0.890 / 0.272 / 105 | 30.11 / 0.886 / 0.248 / 112 |
|                      | Average    | 29.76 / 0.886 / 0.261 / 127 | 29.04 / 0.883 / 0.281 / 80  | 29.53 / 0.886 / 0.279 / 104 | 29.38 / 0.887 / 0.258 / 112 |

Table A11. **Detailed results** on a selection of datasets and methods with the number of Gaussians limited to 2M. Each field contains PSNR, SSIM, LPIPS and FPS respectively. We highlight the **best**, **second best** and **third best** results among all. Slight discrepancies from the main table are due to rounding.
